# Supplementary material for: Treatment utilization and treatment barriers in individuals with body dysmorphic disorder
Source: PubMed Central journal article supplement (PMC7027080; doi:10.1186/s12888-020-02489-0), 2020-02-18
Supplement: 12888_2020_2489_MOESM1_ESM.pdf [file 12888_2020_2489_MOESM1_ESM.pdf]

Table S1

*Predictors of number of treatment barriers (standardized beta with 95% confidence intervals)*

|                                                | Step 1  | Step 2  |                |
|------------------------------------------------|---------|---------|----------------|
|                                                | $\beta$ | $\beta$ | 95% CI         |
| <b>Socio-demographic factors</b>               |         |         |                |
| Age (continuous)                               | -0.17** | -0.12*  | [-0.07, -0.01] |
| Gender (1 = female)                            | -0.05   | -0.06   | [-1.02, 0.23]  |
| Current relationship (1 = yes)                 | -0.06   | -0.06   | [-0.98, 0.19]  |
| College/university degree (1 = yes)            | -0.07   | -0.06   | [-0.99, 0.25]  |
| Employed full-time (1 = yes)                   | -0.01   | -0.01   | [-0.73, 0.57]  |
| <b>Clinical factors</b>                        |         |         |                |
| BDD symptom severity (continuous)              |         | 0.09    | [-0.02, 0.08]  |
| Insight (continuous)                           |         | 0.02    | [-0.35, 0.50]  |
| Diagnosed with BDD (1 = yes)                   |         | -0.17** | [-2.38, -0.59] |
| Diagnosed with other mental disorder (1 = yes) |         | -0.08   | [-1.11, 0.17]  |
| Eating disorder (1 = yes)                      |         | 0.04    | [-0.37, 0.93]  |
| Major depressive disorder (1 = yes)            |         | 0.08    | [-0.18, 1.14]  |
| Appearance-related suicide attempt (1 = yes)   |         | 0.06    | [-0.50, 1.85]  |
| Cosmetic surgery (1 = yes)                     |         | -0.10*  | [-1.36, -0.02] |

*Note.* BDD = Body dysmorphic disorder. \*\*\*  $p < .001$ . \*\*  $p < .01$ . \*  $p < .05$ .

Table S2

*Predictors of treatment barrier “I felt ashamed of my problems” (adjusted odds ratios with 95% confidence intervals)*

|                                                | Step 1 | Step 2 |              |
|------------------------------------------------|--------|--------|--------------|
|                                                | OR     | OR     | 95% CI       |
| <b>Socio-demographic factors</b>               |        |        |              |
| Age (continuous)                               | 0.98   | 0.99   | [0.96, 1.01] |
| Gender (1 = female)                            | 1.02   | 1.03   | [0.67, 1.60] |
| Current relationship (1 = yes)                 | 0.94   | 0.87   | [0.58, 1.31] |
| College/university degree (1 = yes)            | 1.24   | 1.23   | [0.80, 1.90] |
| Employed full-time (1 = yes)                   | 0.72   | 0.71   | [0.45, 1.13] |
| <b>Clinical factors</b>                        |        |        |              |
| BDD symptom severity (continuous)              |        | 1.03   | [0.99, 1.07] |
| Insight (continuous)                           |        | 0.92   | [0.69, 1.23] |
| Diagnosed with BDD (1 = yes)                   |        | 0.43*  | [0.22, 0.81] |
| Diagnosed with other mental disorder (1 = yes) |        | 1.05   | [0.68, 1.64] |
| Eating disorder (1 = yes)                      |        | 0.97   | [0.62, 1.52] |
| Major depressive disorder (1 = yes)            |        | 1.15   | [0.73, 1.82] |
| Appearance-related suicide attempt (1 = yes)   |        | 0.82   | [0.36, 1.87] |
| Cosmetic surgery (1 = yes)                     |        | 0.44** | [0.27, 0.71] |

*Note.* BDD = Body dysmorphic disorder. \*\*\*  $p < .001$ . \*\*  $p < .01$ . \*  $p < .05$ .

Table S3

*Predictors of treatment barrier “Only cosmetic or medical treatments can help with my problems” (adjusted odds ratios with 95% confidence intervals)*

|                                                | Step 1 | Step 2  |              |
|------------------------------------------------|--------|---------|--------------|
|                                                | OR     | OR      | 95% CI       |
| <b>Socio-demographic factors</b>               |        |         |              |
| Age (continuous)                               | 0.97*  | 0.97*   | [0.94, 1.00] |
| Gender (1 = female)                            | 1.28   | 1.16    | [0.69, 1.93] |
| Current relationship (1 = yes)                 | 0.83   | 0.87    | [0.54, 1.40] |
| College/university degree (1 = yes)            | 0.72   | 0.89    | [0.53, 1.47] |
| Employed full-time (1 = yes)                   | 1.11   | 1.18    | [0.70, 2.00] |
| <b>Clinical factors</b>                        |        |         |              |
| BDD symptom severity (continuous)              |        | 1.01    | [0.97, 1.05] |
| Insight (continuous)                           |        | 2.15*** | [1.43, 3.26] |
| Diagnosed with BDD (1 = yes)                   |        | 0.94    | [0.47, 1.88] |
| Diagnosed with other mental disorder (1 = yes) |        | 0.90    | [0.54, 1.50] |
| Eating disorder (1 = yes)                      |        | 1.05    | [0.63, 1.74] |
| Major depressive disorder (1 = yes)            |        | 1.40    | [0.83, 2.37] |
| Appearance-related suicide attempt (1 = yes)   |        | 1.51    | [0.65, 3.53] |
| Cosmetic surgery (1 = yes)                     |        | 2.38**  | [1.43, 3.97] |

*Note.* BDD = Body dysmorphic disorder. \*\*\*  $p < .001$ . \*\*  $p < .01$ . \*  $p < .05$ .

Table S4

*Predictors of treatment barrier “I am unsure if I really need treatment” (adjusted odds ratios with 95% confidence intervals)*

|                                                | Step 1 | Step 2 |              |
|------------------------------------------------|--------|--------|--------------|
|                                                | OR     | OR     | 95% CI       |
| <b>Socio-demographic factors</b>               |        |        |              |
| Age (continuous)                               | 0.97*  | 0.98   | [0.96, 1.01] |
| Gender (1 = female)                            | 0.89   | 0.88   | [0.54, 1.43] |
| Current relationship (1 = yes)                 | 0.86   | 0.80   | [0.50, 1.27] |
| College/university degree (1 = yes)            | 1.17   | .92    | [0.57, 1.49] |
| Employed full-time (1 = yes)                   | 1.22   | 1.08   | [0.65, 1.81] |
| <b>Clinical factors</b>                        |        |        |              |
| BDD symptom severity (continuous)              |        | 0.99   | [0.95, 1.03] |
| Insight (continuous)                           |        | 0.89   | [0.65, 1.23] |
| Diagnosed with BDD (1 = yes)                   |        | 0.23** | [0.10, 0.55] |
| Diagnosed with other mental disorder (1 = yes) |        | 0.61*  | [0.38, 0.98] |
| Eating disorder (1 = yes)                      |        | 1.34   | [0.81, 2.22] |
| Major depressive disorder (1 = yes)            |        | 0.49*  | [0.30, 0.82] |
| Appearance-related suicide attempt (1 = yes)   |        | 0.23   | [0.05, 1.06] |
| Cosmetic surgery (1 = yes)                     |        | 0.82   | [0.48, 1.41] |

*Note.* BDD = Body dysmorphic disorder. \*\*\*  $p < .001$ . \*\*  $p < .01$ . \*  $p < .05$ .

Table S5

*Predictors of treatment barrier “I was unsure about who to see or where to go” (adjusted odds ratios with 95% confidence intervals)*

|                                                | Step 1 | Step 2 |              |
|------------------------------------------------|--------|--------|--------------|
|                                                | OR     | OR     | 95% CI       |
| <b>Socio-demographic factors</b>               |        |        |              |
| Age (continuous)                               | 0.98   | 0.99   | [0.96, 1.01] |
| Gender (1 = female)                            | 1.04   | 1.09   | [0.68, 1.77] |
| Current relationship (1 = yes)                 | 1.06   | 1.00   | [0.64, 1.57] |
| College/university degree (1 = yes)            | 0.66   | 0.67   | [0.41, 1.09] |
| Employed full-time (1 = yes)                   | 1.16   | 1.20   | [0.73, 1.98] |
| <b>Clinical factors</b>                        |        |        |              |
| BDD symptom severity (continuous)              |        | 1.04*  | [1.00, 1.08] |
| Insight (continuous)                           |        | 0.80   | [0.58, 1.11] |
| Diagnosed with BDD (1 = yes)                   |        | 0.67   | [0.33, 1.34] |
| Diagnosed with other mental disorder (1 = yes) |        | 0.85   | [0.53, 1.38] |
| Eating disorder (1 = yes)                      |        | 0.74   | [0.45, 1.23] |
| Major depressive disorder (1 = yes)            |        | 0.93   | [0.57, 1.53] |
| Appearance-related suicide attempt (1 = yes)   |        | 1.19   | [0.51, 2.76] |
| Cosmetic surgery (1 = yes)                     |        | 0.56*  | [0.33, 0.96] |

*Note.* BDD = Body dysmorphic disorder. \*\*\*  $p < .001$ . \*\*  $p < .01$ . \*  $p < .05$ .
